# Supplementary material for: Stability study of organometal halide perovskite and its enhanced X-ray scintillation from the incorporation of anodic TiO2nanotubes
Source: Royal Society of Chemistry journal article supplement (doi:10.1039/d0ra08881a), 2020-01-01
Supplement: d0ra08881a1.pdf [file d0ra08881a1.pdf]

## Stability study of halide perovskite and its enhanced X-ray scintillation from the incorporating of anodic TiO<sub>2</sub> nanotubes

Hui Li,<sup>a</sup> Zhenhua Chen,<sup>b\*</sup> Zhuocheng Sang,<sup>a</sup> Xiangzhi Zhang,<sup>b</sup> Yong wang<sup>b</sup>

<sup>a</sup>Department of Applied Physics, Donghua University, Songjiang District, Shanghai 201620, China

<sup>b</sup>Shanghai Synchrotron Radiation Facility (SSRF), Shanghai Advanced Research Institute, Chinese Academy of Sciences, Shanghai 201800, China

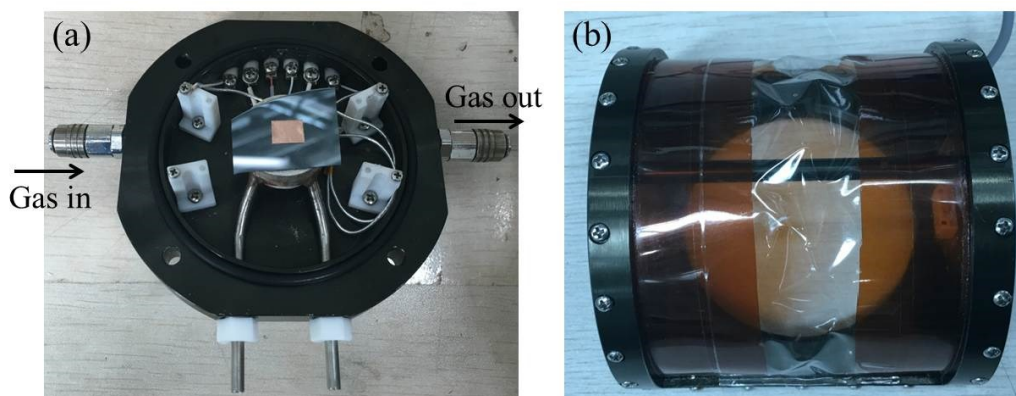

Figure S1. Schematic of the spectrometric measurement setup mounted on the BL14B beamline.

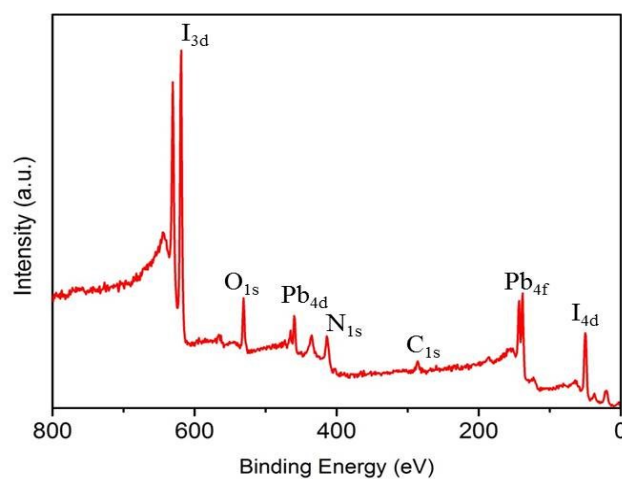

Figure S2. XPS measurements for perovskite CH<sub>3</sub>NH<sub>3</sub>PbI<sub>3</sub> film deposited on FTO glass.

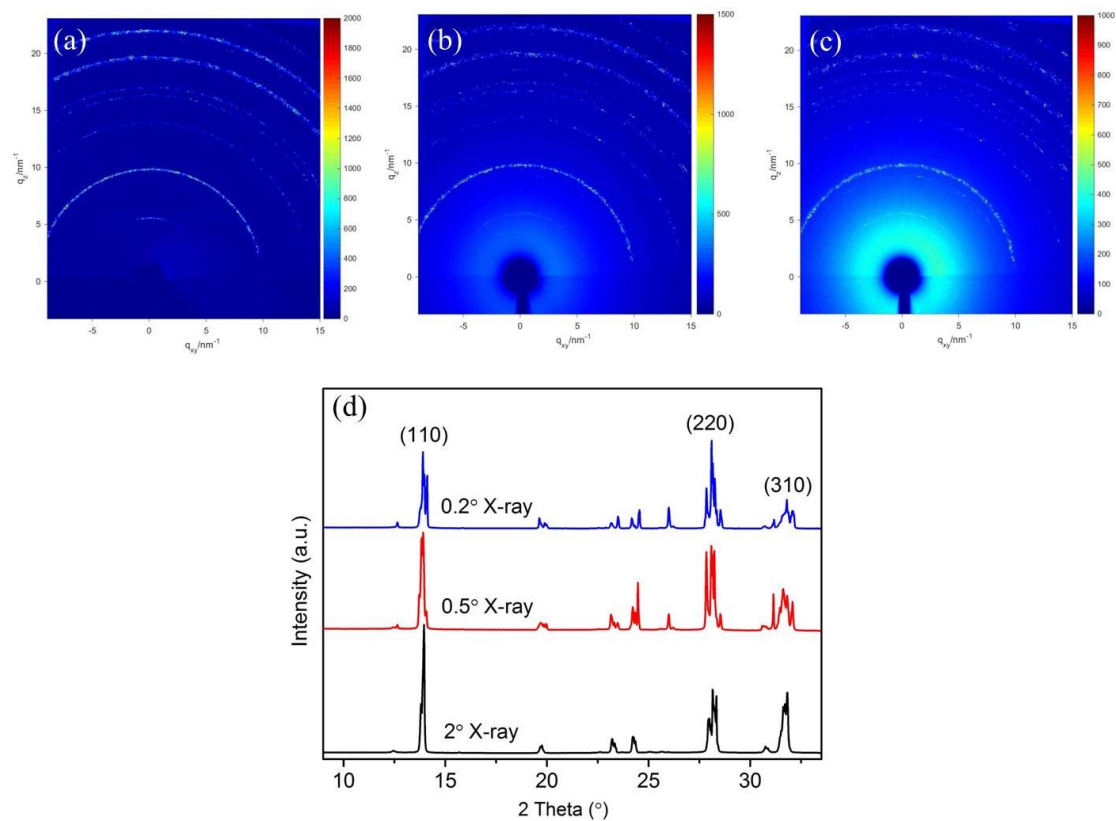

Figure S3. (a)-(c) The two-dimensional diffraction signals of the as prepared  $\text{CH}_3\text{NH}_3\text{PbI}_3/\text{TiO}_2$  NP films using incident measurement grazing angles of  $2^\circ$ ,  $0.5^\circ$ , and  $0.2^\circ$ . (d) The dimensional diffraction spectrum integrated from Figure S3a-3c in the out-of-plane direction.

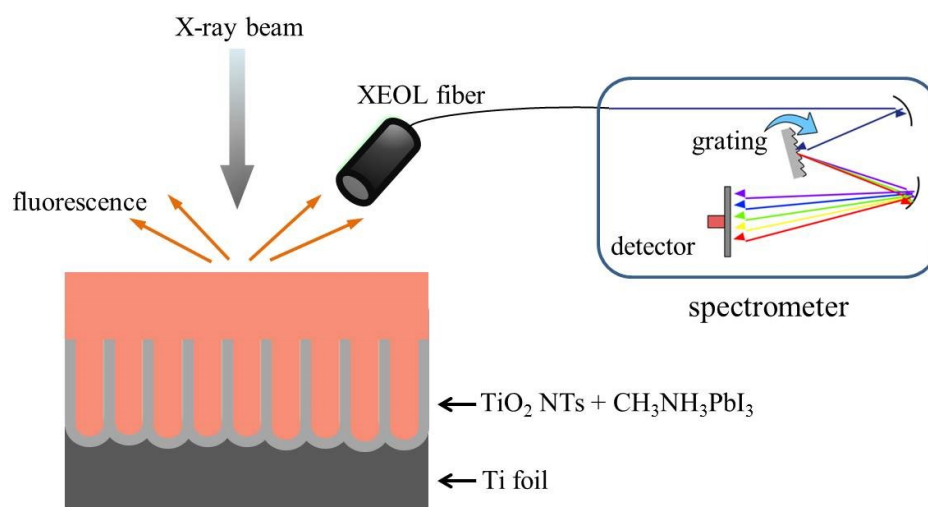

Figure S4. Schematic of the spectrometric measurement setup mounted on the BL13W beamline at SSRF.

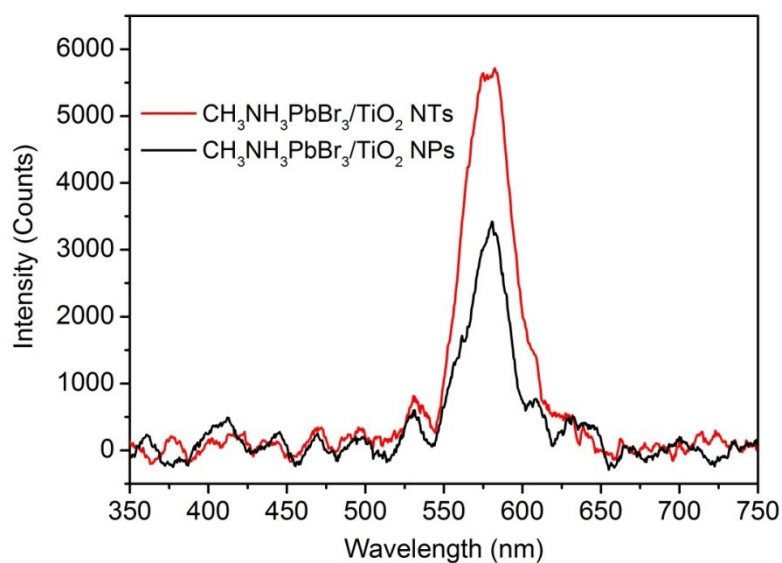

Figure S5. XEOL spectra of  $\text{CH}_3\text{NH}_3\text{PbBr}_3/\text{TiO}_2$  NPs and  $\text{CH}_3\text{NH}_3\text{PbBr}_3/\text{TiO}_2$  NTs with 40 keV X-ray excitation.

Table S1. Parameters obtained from fitting the Pb L3 EXAFS by scattering from a single coordination shell of iodine.

| Sample                                       | Atomic number, $N^a$ | Amplitude damping factor, $S_0^2$ | Debye-Waller factor, $\sigma^2$ ( $\text{\AA}^2$ ) | Bond length, Pb-I <sub>2</sub> , $r$ ( $\text{\AA}$ ) | R factor |
|----------------------------------------------|----------------------|-----------------------------------|----------------------------------------------------|-------------------------------------------------------|----------|
| $\text{CH}_3\text{NH}_3\text{PbI}_3$         | 6                    | 0.6777                            | 0.0165                                             | 3.1415                                                | 0.0089   |
| $\text{CH}_3\text{NH}_3\text{PbI}_3$ , 80%RH | 6                    | 0.7037                            | 0.0176                                             | 3.1858                                                | 0.0037   |

Table S2. Fitted parameters for CH<sub>3</sub>NH<sub>3</sub>PbI<sub>3</sub> samples prepared on TiO<sub>2</sub> nanotubes or TiO<sub>2</sub> nanoparticles.

Fluorescence decay profiles were fitted by exponential function equation:  
 $I(t) = A_0 + A_1 * \exp(-t/\tau_1) + A_2 * \exp(-t/\tau_2)$ .  $\tau_1$  and  $\tau_2$  denote the decay time for the faster and the slower components, and  $A_1$  and  $A_2$  are the fluorescence amplitudes.

| Sample                                                                                       | A <sub>0</sub> | $\tau_1$<br>(ns) | $\tau_2$<br>(ns) | A <sub>1</sub> | A <sub>2</sub> |
|----------------------------------------------------------------------------------------------|----------------|------------------|------------------|----------------|----------------|
| CH <sub>3</sub> NH <sub>3</sub> PbI <sub>3</sub> /TiO <sub>2</sub> nanotubes at (790 nm)     | 0.14           | 12.9             | 220              | 40             | 1              |
| CH <sub>3</sub> NH <sub>3</sub> PbI <sub>3</sub> /TiO <sub>2</sub> nanoparticles at (790 nm) | 0.26           | 12               | 170              | 80             | 0.9            |
